# Supplementary material
Source: Springer Nature journal article supplement (https://www.springermedizin.de/resource/supplementary/12916_2011_428_MOESM3_ESM.pdf/9599944)
Supplement: MOESM3 [file 9599944]

|   | <b>Level of the ICF</b>                     | <b>Pattern of frailty</b>                             | <b>Common causes</b>                                                                                | <b>Other causes</b>                                                                            |
|---|---------------------------------------------|-------------------------------------------------------|-----------------------------------------------------------------------------------------------------|------------------------------------------------------------------------------------------------|
| → | Health condition                            | Unstable health conditions                            | Infections, injuries, cardiorespiratory disease                                                     | Frequent transition between primary care and acute care<br>Sub-optimal management              |
|   |                                             | Under nutrition <sup>a</sup>                          | Inability to prepare meals                                                                          | Inability to purchase food<br>Exhaustion                                                       |
| → | Impairment of the body's structure/function | Psychological factors <sup>a</sup>                    | Depression, grief                                                                                   | Negative outlook                                                                               |
|   |                                             | Impaired cognition                                    | Dementia                                                                                            | Lack of compensatory strategies                                                                |
| → | Activity limitation <sup>b</sup>            | Impaired vision / hearing                             | Macular degeneration, cataracts / presbycusis                                                       | Lack of appropriate equipment / aids / eye surgery                                             |
|   |                                             | Decreased mobility <sup>a</sup> / decreased self care | Impaired balance/co-ordination and /or strength<br>Environmental barriers<br>Recent traumatic event | Decreased cardiovascular endurance<br>Fear of falling                                          |
| → | Participation restriction <sup>c</sup>      | Lack of participation in life roles                   | Social barriers<br>Limited family contact<br>Environmental barriers                                 | Decreased self-efficacy                                                                        |
| → | Environmental contextual factors            | Problems with services or support systems             | Services not readily available<br>Lack of service co-ordination                                     | Carer stress<br>Interaction with support network<br>Low income<br>Physical or social isolation |
